# Supplementary material for: Coordination molecular hats binding acetonitrile via C–H⋯π interactions
Source: Royal Society of Chemistry journal article supplement (doi:10.1039/b719605a), 2008-01-01

## Electronic Supplementary Material

# Coordination Molecular Hats Binding an Acetonitrile via C–H··· $\pi$ Interactions

Li-Xia Liu,<sup>a</sup> Hai-Ping Huang,<sup>a</sup> Xin Li,<sup>a</sup> Qing-Fu Sun,<sup>a</sup> Cui-Rong Sun,<sup>b</sup> Yi-Zhi Li<sup>c</sup> and  
Shu-Yan Yu<sup>\*a</sup>

<sup>a</sup>Laboratory for Self-Assembly Chemistry, Department of Chemistry, Renmin University of China, Beijing 100872, P. R. China. Fax: (+86)10-6251-6614; Tel: (+86)10-6251-6614; E-mail: [yusy@chem.ruc.edu.cn](mailto:yusy@chem.ruc.edu.cn)

<sup>b</sup>Department of Chemistry, Zhejiang University, Hangzhou 310027, P. R. China.

<sup>c</sup>State Key Laboratory of Coordination Chemistry, Institute of Coordination Chemistry, Nanjing University, Nanjing, 210093, P. R. China.

\*To whom correspondence should be addressed. E-mail: [yusy@chem.ruc.edu.cn](mailto:yusy@chem.ruc.edu.cn)

### Table of Contents:

|                                                          |    |
|----------------------------------------------------------|----|
| Experimental Section .....                               | S2 |
| <sup>1</sup> H NMR, <sup>13</sup> C NMR and ESI-MS ..... | S4 |
| Hydrogen bond lengths (Å) and angles (°) for 1a.....     | S8 |
| Crystal packing .....                                    | S9 |

## Experimental Section

**Materials and Instruments:** 1,10-phenanthroline (phen) and potassium hexafluorophosphate (99%) were purchased from ACROS ORGANICS and used without further purification. All other chemicals and solvents were of reagent grade and were purified according to conventional methods.  $^1\text{H}$  and  $^{13}\text{C}$  NMR experiments were performed on a Bruker Avance DMX400 spectrometer using TMS as internal standard. ESI-MS measurements were recorded with HP5989B mass spectrometer.

**X-ray Structural Determinations:** X-ray diffraction measurements were carried out at 291 K on a Bruker Smart Apex CCD area detector equipped with a graphite monochromated MoK $\alpha$  radiation ( $\lambda = 0.71073 \text{ \AA}$ ). The absorption correction for all complexes was performed using SADABS. All the structures were solved by direct methods and refined employing full-matrix least-squares on F2 by using SHELXTL (Bruker, 2000) program and expanded using Fourier techniques. All non-H atoms of the complexes were refined with anisotropic thermal parameters. The hydrogen atoms were included in idealized positions.

### Synthesis:

**[Pd<sub>3</sub>(C5-phen)<sub>3</sub>L<sub>3</sub>](NO<sub>3</sub>)<sub>3</sub> (1):** [Pd(phen-crown-5)](NO<sub>3</sub>)<sub>2</sub> (60.1 mg, 0.1 mmol) was added to a suspension of naphthanoimidazole (Nz) (16.8 mg, 0.1 mmol) in H<sub>2</sub>O (5 mL), and the mixture was stirred for 2 h at room temperature. The resulting clear yellow solution was evaporated to dryness to give a yellow solid. Pure **1** as a microcrystalline yellow solid was obtained by the vapor diffusion of diethyl ether into a 2 mM solution of **1** in methanol at room temperature. Yield: 69.9 mg (99%).  $^1\text{H}$  NMR (400 MHz, D<sub>2</sub>O/[D<sub>6</sub>]acetone = 1:2, 25 °C, TMS, ppm):  $\delta = 9.72$  (s, 3 H, Nz-H<sub>2</sub>), 9.21 (d,  $J = 8.4$  Hz, 6 H; phen-H<sub>2,9</sub>), 8.75 (s, 6 H, Nz-H<sub>4,9</sub>), 8.50 (d,  $J = 4.8$  Hz, 6 H; phen-H<sub>4,7</sub>), 8.00 (m, 6H; phen-H<sub>3,8</sub>), 7.72 (m, 6 H, Nz-H<sub>5,8</sub>), 7.19 (m, 6 H, Nz-H<sub>6,7</sub>), 4.70 (m, 12H;OCH<sub>2</sub>), 4.19 (m, 12H; CH<sub>2</sub>O), 3.88 (m, 12H;OCH<sub>2</sub>), 3.83 (m, 12H; CH<sub>2</sub>O). ESI-MS (methanol):  $m/z$  996.7 [**1** - 2NO<sub>3</sub><sup>-</sup>]<sup>2+</sup>, 643.8 [**1** - 3NO<sub>3</sub><sup>-</sup>]<sup>3+</sup>. The PF<sub>6</sub><sup>-</sup> salt of **1** (**1a**) was obtained by adding a ten-fold excess of KPF<sub>6</sub> to its aqueous solution at 333 K, which resulted in the immediate deposition of **1a** as yellow microcrystals in quantitative yield. The crystals were filtered, washed with minimum amount of cold water and dried under vacuum.  $^1\text{H}$  NMR (400 MHz, CD<sub>3</sub>CN, 25 °C, TMS, ppm):  $\delta = 9.06$  (d,  $J = 8.4$  Hz, 6 H; phen-H<sub>2,9</sub>), 9.05 (s, 3 H, Nz-H<sub>2</sub>), 8.59 (s, 6 H, Nz-H<sub>4,9</sub>), 8.27 (d,  $J = 5.2$  Hz, 6 H;

phen-H<sub>4,7</sub>), 7.83 (dd,  $J = 5.2$  Hz,  $J = 8.4$ , 6H; phen-H<sub>3,8</sub>), 7.73 (dd,  $J = 3.2$  Hz,  $J = 6.4$  Hz, 6 H, Nz-H<sub>5,8</sub>), 7.19 (dd,  $J = 3.1$  Hz,  $J = 6.5$  Hz, 6 H, Nz-H<sub>6,7</sub>), 4.61 (m, 12H;OCH<sub>2</sub>), 4.08 (m, 12H; CH<sub>2</sub>O), 3.78 (m, 12H;OCH<sub>2</sub>), 3.71 (m, 12H; CH<sub>2</sub>O). <sup>13</sup>C NMR (400 MHz, CD<sub>3</sub>CN, 25 °C, TMS, ppm):  $\delta$  153.9, 150.6, 145.1, 143.8, 140.6, 136.1, 130.4, 128.3, 127.5, 125.8, 124.5, 113.7, 74.9, 70.6, 70.0. ESI-MS (acetonitrile):  $m/z$  1038.2 [**1a** – 2 PF<sub>6</sub><sup>-</sup>]<sup>2+</sup>, 643.8 [**1a** – 3 PF<sub>6</sub><sup>-</sup>]<sup>3+</sup>.

**[Pd<sub>3</sub>(C6-phen)<sub>3</sub>L<sub>3</sub>](NO<sub>3</sub>)<sub>3</sub> (2)**: The same procedure as employed for **1** was followed except that [Pd(phen-crown-6)](NO<sub>3</sub>)<sub>2</sub> (64.5 mg, 0.1 mmol) and Nz (16.8 mg, 0.1 mmol) was used as the starting material. Pure **2** as a microcrystalline yellow solid was obtained by the vapor diffusion of diethyl ether into a 2 mM solution of **2** in methanol at room temperature. Yield: 74.3 mg (99%). <sup>1</sup>H NMR (400 MHz, [D<sub>6</sub>]Acetone/D<sub>2</sub>O=2:1, 25 °C, TMS, ppm):  $\delta$  = 9.74 (s, 3 H, Nz-H<sub>2</sub>), 9.22 (d,  $J = 8.4$  Hz, 6 H; phen-H<sub>2,9</sub>), 8.75 (s, 6 H, Nz-H<sub>4,9</sub>), 8.50 (d,  $J = 4.8$  Hz, 6 H; phen-H<sub>4,7</sub>), 8.00 (m, 6H; phen-H<sub>3,8</sub>), 7.73 (m, 6 H, Nz-H<sub>5,8</sub>), 7.18 (m, 6 H, Nz-H<sub>6,7</sub>), 4.71 (m, 12H;OCH<sub>2</sub>), 4.15 (m, 12H; CH<sub>2</sub>O), 3.86 (m, 12H; CH<sub>2</sub>O), 3.83 (m, 12H;OCH<sub>2</sub>), 3.77 (m, 12H; CH<sub>2</sub>O). <sup>13</sup>C NMR (400 MHz, CD<sub>3</sub>CN, 25 °C, TMS, ppm):  $\delta$  154.3, 150.7, 144.9, 143.4, 140.2, 136.0, 130.4, 127.9, 127.6, 126.0, 124.2, 113.0, 74.4, 70.2, 70.0, 69.8. ESI-MS (methanol):  $m/z$  1062.7 [**2** – 2NO<sub>3</sub><sup>-</sup>]<sup>2+</sup>, 687.8 [**2** – 3NO<sub>3</sub><sup>-</sup>]<sup>3+</sup>.

**Figure S1.**  $^1\text{H}$  NMR spectra of **1** (400M,  $[\text{D}_6]$ Acetone/ $\text{D}_2\text{O}$ =2:1, 25 °C, TMS)

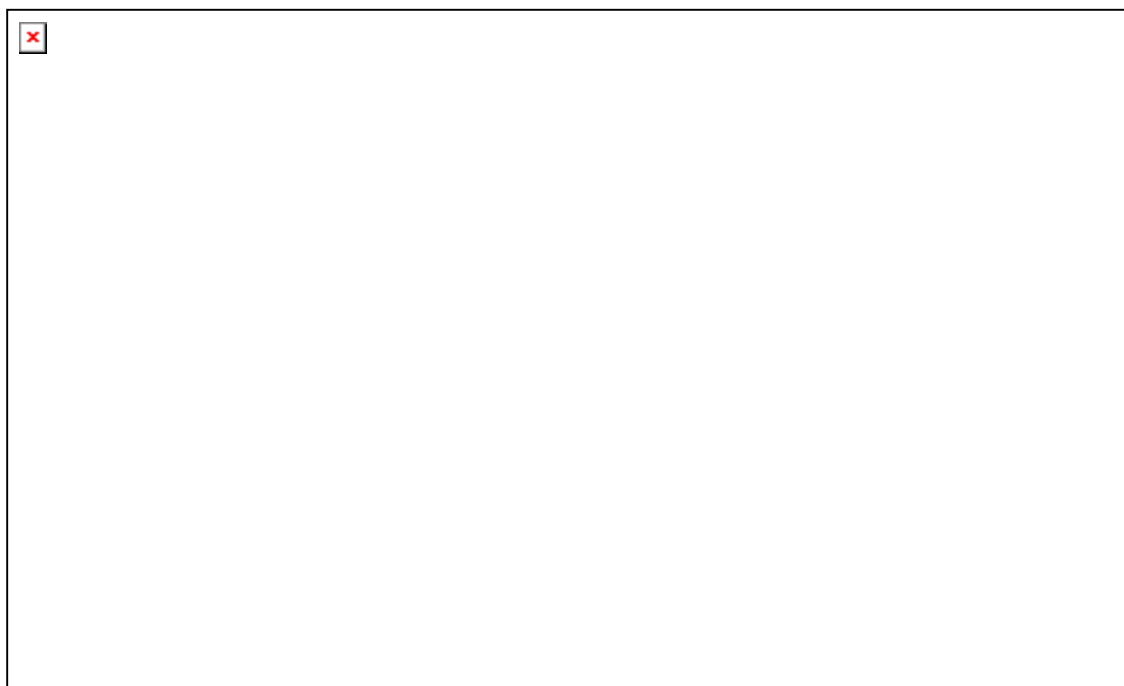

**Figure S2.**  $^{13}\text{C}$  NMR spectra of **1a** (400M,  $[\text{D}_6]$ Acetone/ $\text{D}_2\text{O}$ =2:1, 25 °C, TMS)

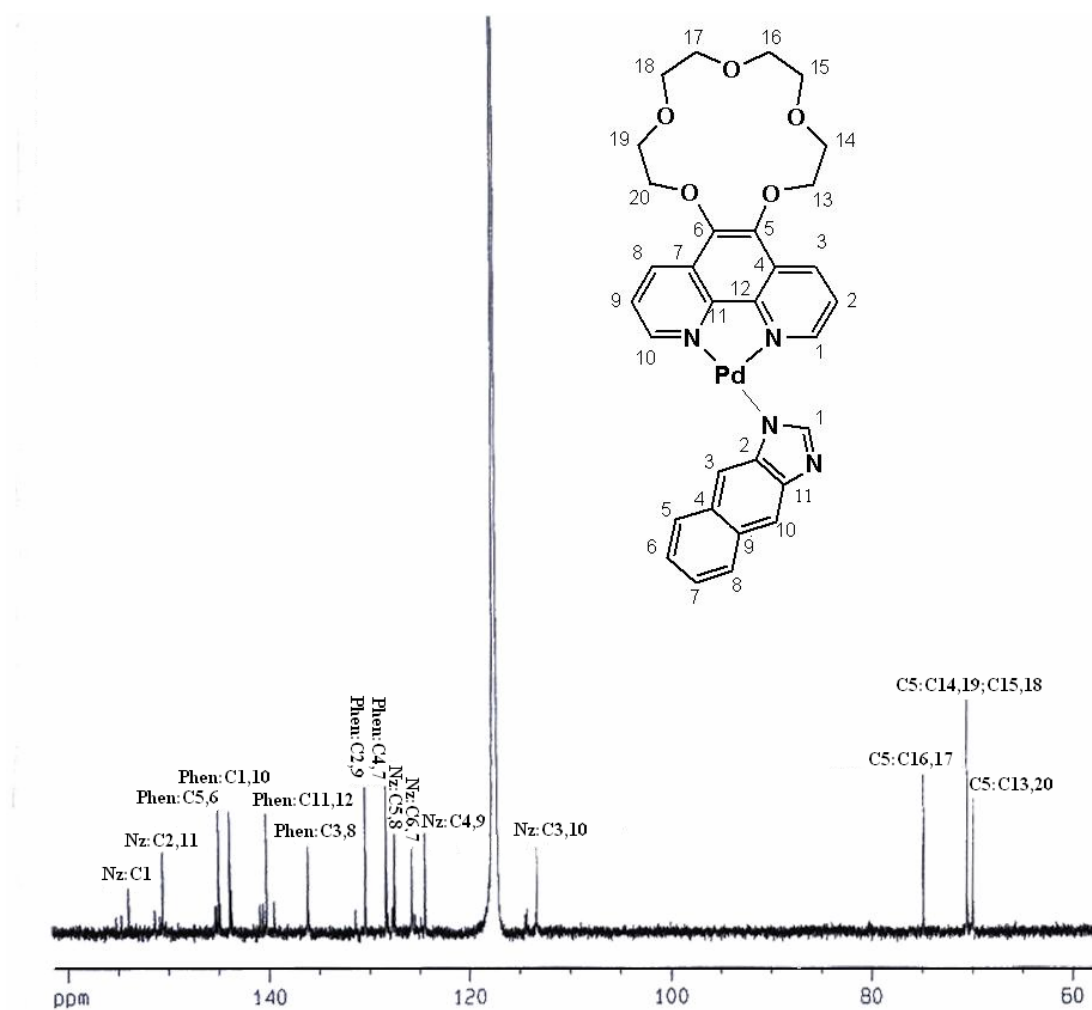

**Figure S3.**  $^1\text{H}$  NMR spectra of **2** (400M,  $[\text{D}_6]$ Acetone/ $\text{D}_2\text{O}$ =2:1, 25 °C, TMS)

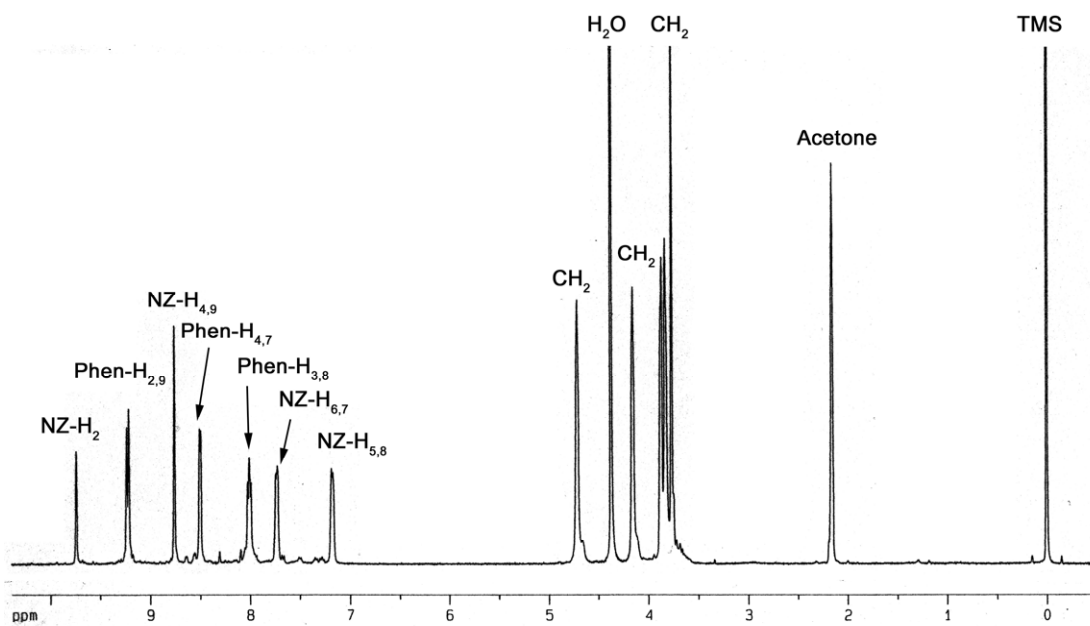

**Figure S4.**  $^{13}\text{C}$  NMR spectra of **2** (400M,  $[\text{D}_6]$ Acetone/ $\text{D}_2\text{O}$ =2:1, 25 °C, TMS)

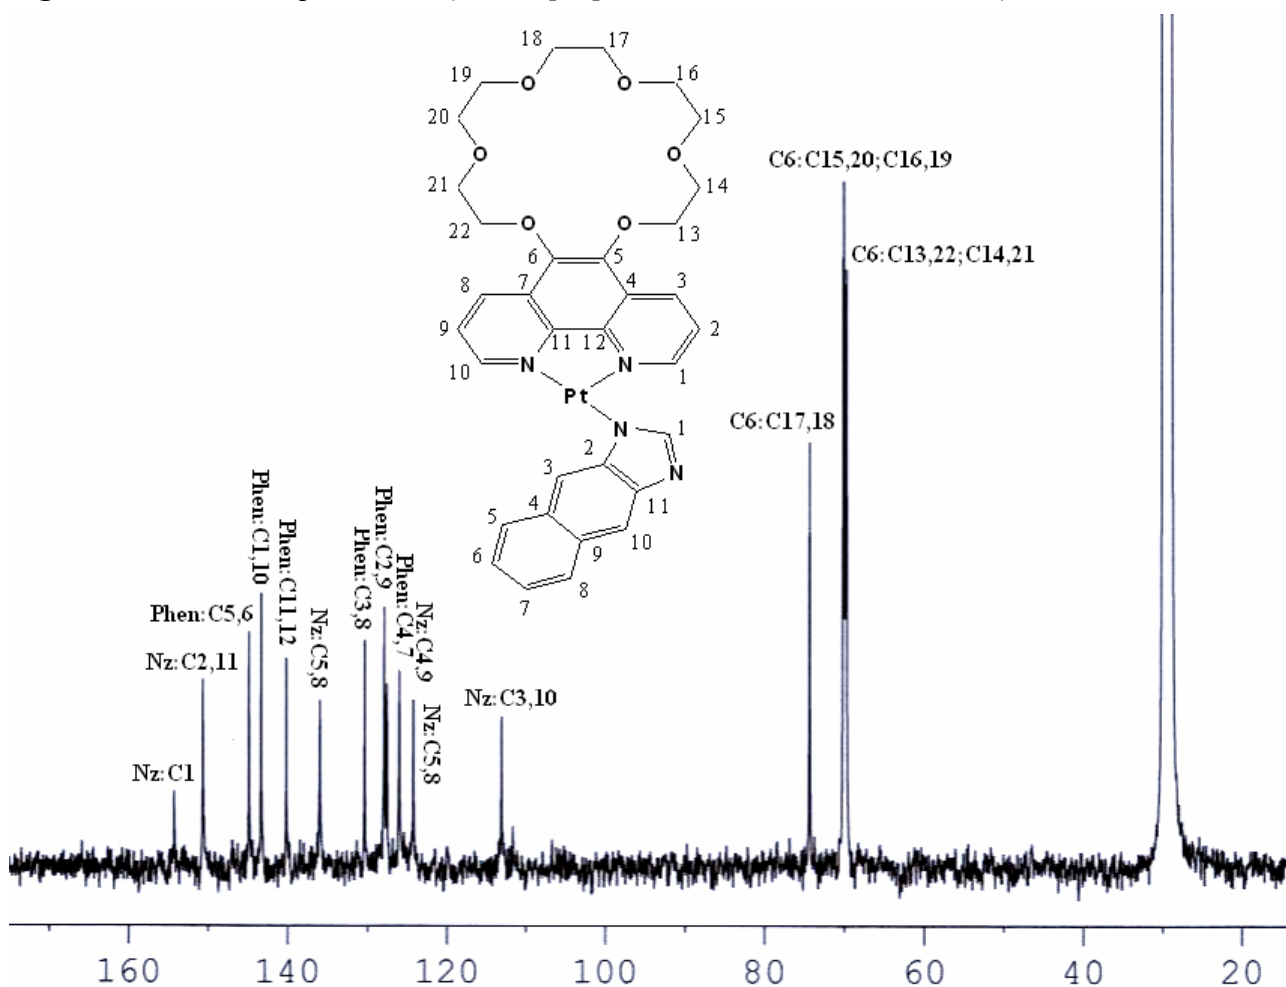

**Figure S5.** ESI-MS spectra of **1** in methanol; the inset shows the isotopic distribution of the species  $[1-3\text{NO}_3^-]^{3+}$ .

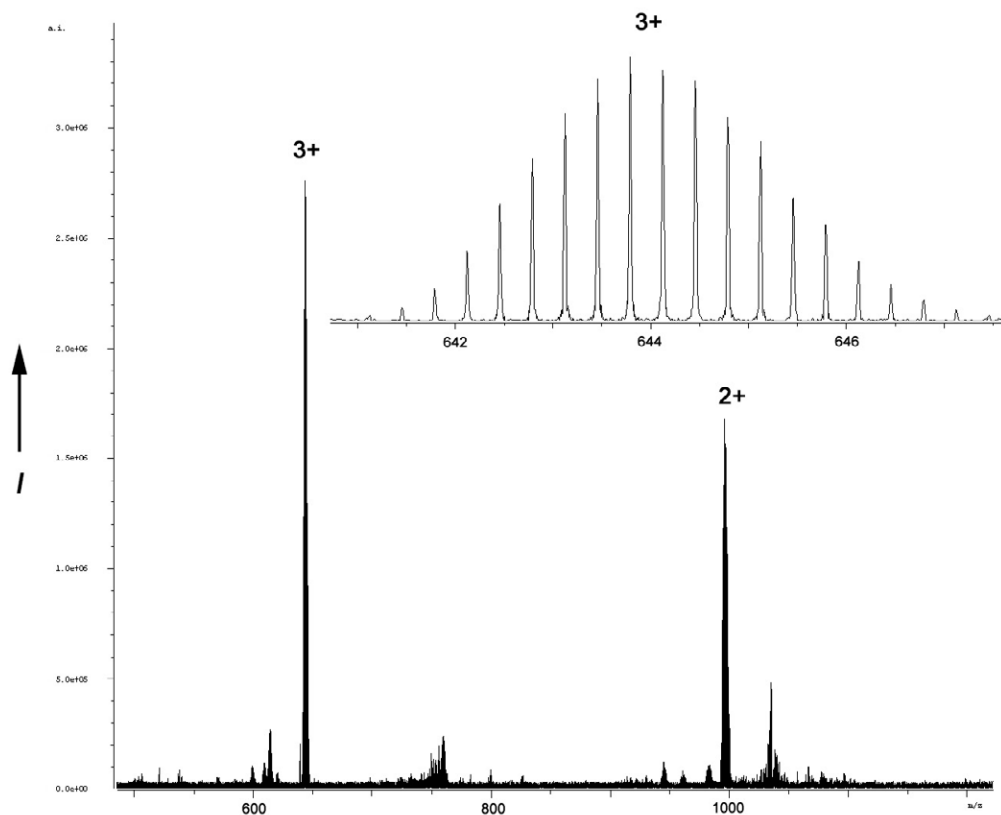

**Figure S6.** ESI-MS spectra of **1a** in acetonitrile; the inset shows the isotopic distribution of the species  $[1a-3\text{NO}_3^-]^{3+}$ .

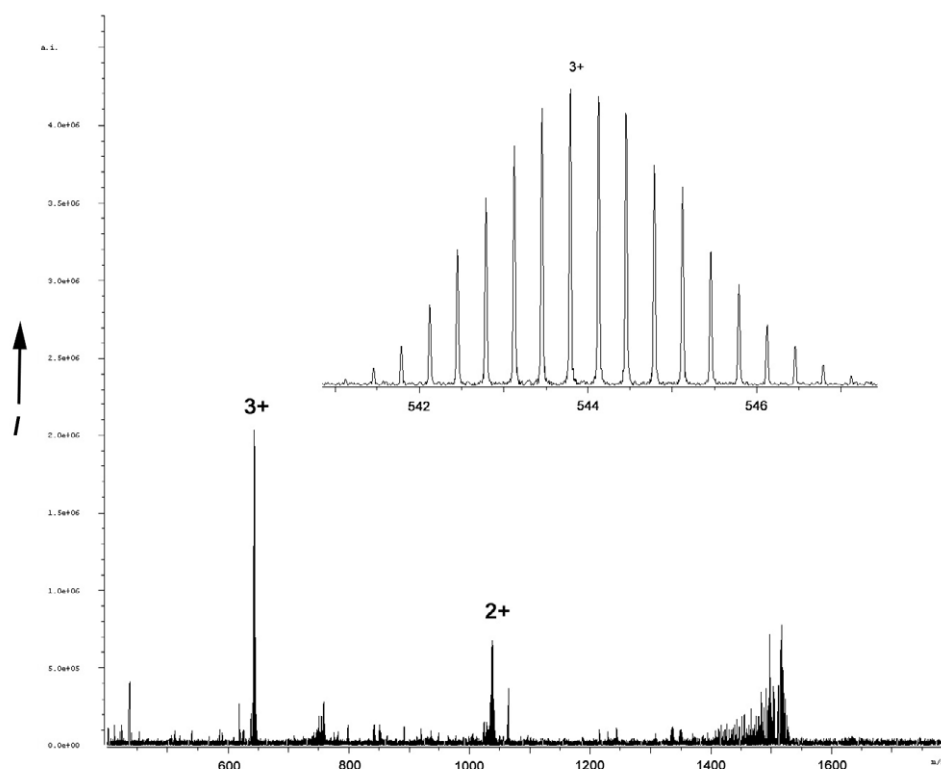

**Figure S7.** ESI-MS spectra of **2** in methanol; the inset shows the isotopic distribution of the species  $[2-3\text{NO}_3^-]^{3+}$ .

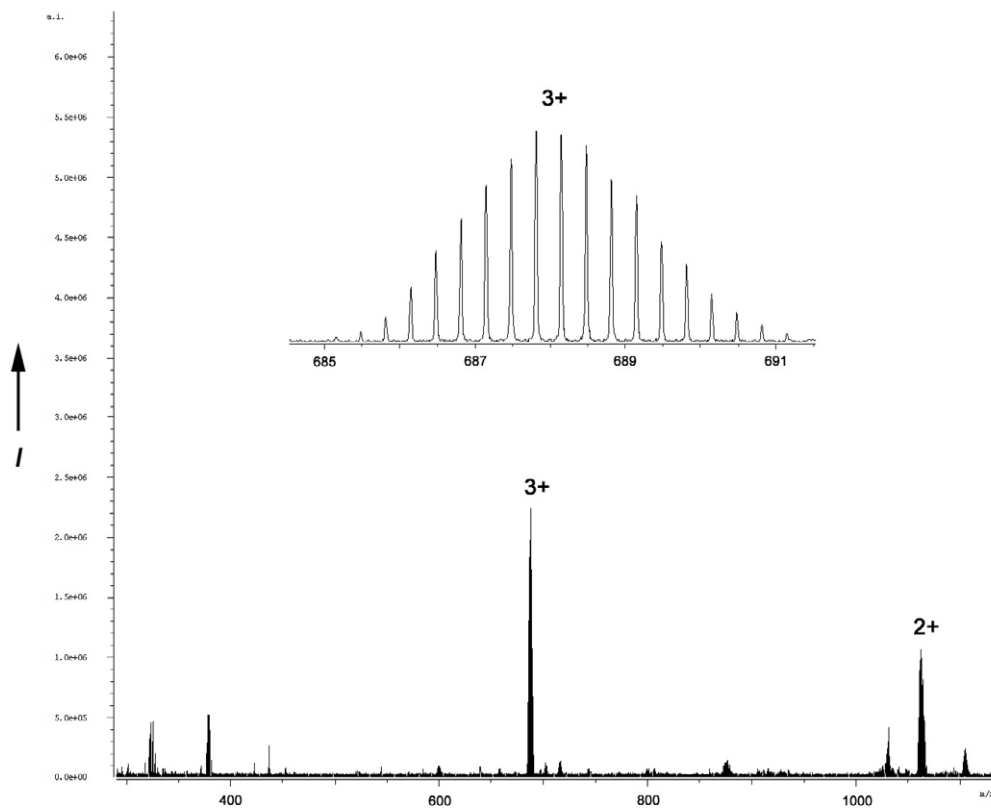

**Table S1.** Hydrogen bond lengths (Å) and angles (°) for **1a**

| D–H···A                     | D(D–H) | D(H···A) | D(D···A) | ∠(DHA) |
|-----------------------------|--------|----------|----------|--------|
| C1–H1···N13                 | 0.93   | 2.43     | 3.169(5) | 136    |
| C8–H8···F12 <sup>a</sup>    | 0.93   | 2.40     | 3.277(4) | 157    |
| C103–H10···F6               | 0.93   | 2.44     | 3.186(5) | 135    |
| C15–H15···F3 <sup>b</sup>   | 0.93   | 2.43     | 3.189(4) | 139    |
| C26–H26···F1                | 0.93   | 2.41     | 3.081(5) | 129    |
| C47–H47···O10 <sup>b</sup>  | 0.93   | 2.57     | 3.273(5) | 133    |
| C58–H58···O7 <sup>b</sup>   | 0.93   | 2.45     | 3.249(5) | 145    |
| C69–H69···O8 <sup>b</sup>   | 0.93   | 2.17     | 3.044(5) | 156    |
| C74–H74B···O2               | 0.93   | 2.20     | 2.558(5) | 100    |
| C79–H79A···O13 <sup>c</sup> | 0.93   | 2.47     | 3.142(5) | 126    |
| C80–H80B···O12 <sup>c</sup> | 0.93   | 2.42     | 3.317(5) | 155    |
| C83–H83A···F14 <sup>b</sup> | 0.93   | 2.54     | 3.483(5) | 165    |
| C89–H89A···F4 <sup>d</sup>  | 0.93   | 2.41     | 3.226(5) | 142    |
| C95–H95C···N7               | 0.93   | 2.27     | 3.198(5) | 163    |
| C99–H99B···F6               | 0.93   | 2.46     | 3.209(5) | 134    |

Symmetry codes: <sup>a</sup> x, -1+y, z; <sup>b</sup> 2-x, -y, 1-z; <sup>c</sup> 1+x, -1+y, z; <sup>d</sup> 1-x, 1-y, 1-z.



**Figure S8.** Packing diagram with channel formed by the cavity of complex **1a** viewed along the b axis.

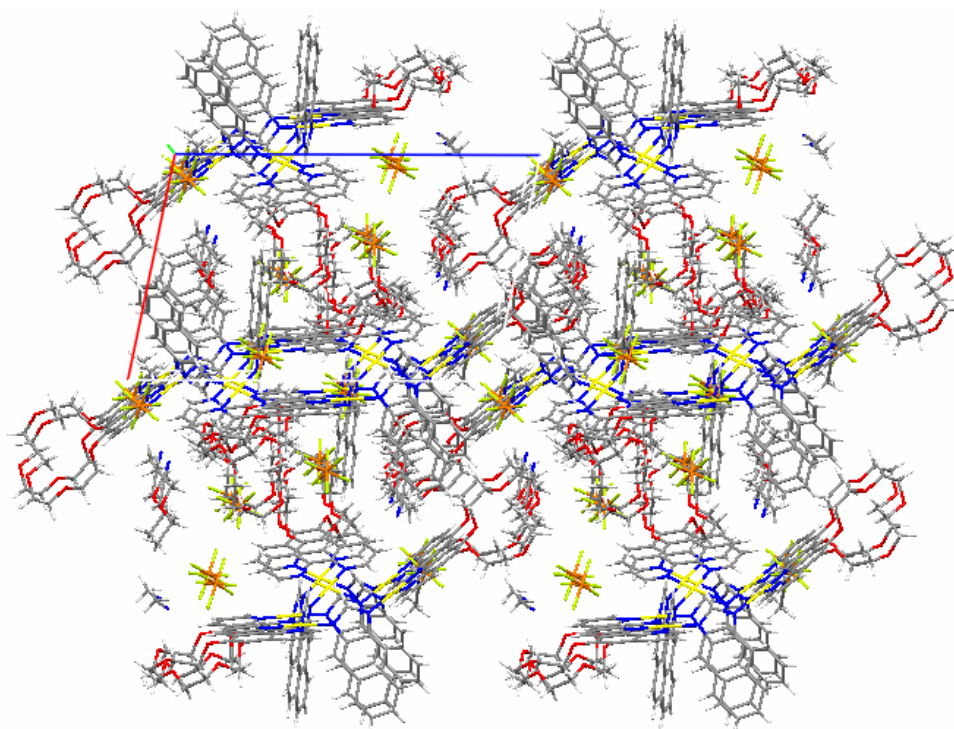

Supplement: b719605a.pdf [file b719605a.pdf]
